# Supplementary material for: Exploring the Altered Dynamics of Mammalian Central Carbon Metabolic Pathway in Cancer Cells: A Classical Control Theoretic Approach
Source: PubMed Central journal article supplement (PMC4569588; doi:10.1371/journal.pone.0137728), 2015-09-14
Supplement: pone.0137728.s004.pdf [file pone.0137728.s004.pdf]

**S1 Table. Simulation details for Fig. 3.** It contains the simulation details and the model parameters which have been used to validate the order reduction technique using COPASI software.

**A: Simulation information**

| Simulation specification |                         |                     |
|--------------------------|-------------------------|---------------------|
| Simulation task          | Time course             |                     |
| Duration                 | 500 s                   |                     |
| Interval size            | 5 s                     |                     |
| Intervals                | 100                     |                     |
| Method                   | Deterministic (LSODA)   |                     |
| Parameter                | Integrate reduced model | 0                   |
|                          | Relative tolerance      | $1 \times 10^{-6}$  |
|                          | Absolute tolerance      | $1 \times 10^{-12}$ |
|                          | Max internal steps      | 10000               |

**B: Model information**

| Original pathway (Fig. 3(a)) model specifications |       |                 |
|---------------------------------------------------|-------|-----------------|
| Initial Species Values                            |       |                 |
|                                                   | A     | 0.5 mmol/ml     |
|                                                   | B     | 0.5 mmol/ml     |
|                                                   | C     | 0.5 mmol/ml     |
|                                                   | D     | 0.5 mmol/ml     |
| Kinetic Parameters                                |       |                 |
| $v_1$ (Rate law: Noncompetitive inhibition (irr)) | $K_m$ | 0.1 mmol/ml     |
|                                                   | $V$   | 0.1 mmol/(ml×s) |
|                                                   | $K_i$ | 0.1 mmol/ml     |
| $v_2$ (Rate law: Henri-Michaelis-Menten (irr))    | $K_m$ | 0.1 mmol/ml     |
|                                                   | $V$   | 0.1 mmol/(ml×s) |
| $v_3$ (Rate law: Henri-Michaelis-Menten (irr))    | $K_m$ | 0.1 mmol/ml     |
|                                                   | $V$   | 0.1 mmol/(ml×s) |
| Reduced pathway (Fig. 3(b)) model specifications  |       |                 |
| Initial Species Values                            |       |                 |
|                                                   | B     | 0.5 mmol/ml     |
|                                                   | D     | 0.5 mmol/ml     |
|                                                   | A     | 0.5 mmol/ml     |
| Kinetic Parameters                                |       |                 |
| $v_1$ (Rate law: Noncompetitive inhibition (irr)) | $K_m$ | 0.1 mmol/ml     |
|                                                   | $V$   | 0.1 mmol/(ml×s) |
|                                                   | $K_i$ | 0.1 mmol/ml     |
| $v_2$ (Rate law: Henri-Michaelis-Menten (irr))    | $K_m$ | 0.1 mmol/ml     |
|                                                   | $V$   | 0.1 mmol/(ml×s) |
