# Supplementary material for: Exploring the Altered Dynamics of Mammalian Central Carbon Metabolic Pathway in Cancer Cells: A Classical Control Theoretic Approach
Source: PubMed Central journal article supplement (PMC4569588; doi:10.1371/journal.pone.0137728), 2015-09-14
Supplement: pone.0137728.s009.pdf [file pone.0137728.s009.pdf]

**S6 Table. Simulation parameters.** Here, the simulation parameters for the proposed CCM pathway model are given.

|                       |                                      |                                   |
|-----------------------|--------------------------------------|-----------------------------------|
| Simulation Time       | Start Time                           | 10 s                              |
|                       | Stop Time                            | 30000 s                           |
| Solver option         | Type                                 | Variable-step                     |
|                       | Solver                               | Ode45(Dormand-Prince)             |
|                       | Max step size                        | Auto                              |
|                       | Min step size                        | Auto                              |
|                       | Relative tolerance                   | $1 \times 10^{-3}$                |
|                       | Initial step size                    | Auto                              |
|                       | Absolute tolerance                   | Auto                              |
|                       | Shape preservation                   | Disable all                       |
|                       | Number of consecutive min steps      | 1                                 |
| Zero-crossing options | Zero-crossing control                | Use local settings                |
|                       | Algorithm                            | Nonadaptive                       |
|                       | Time tolerance                       | $10 \times 128 \times \text{eps}$ |
|                       | Signal threshold                     | Auto                              |
|                       | Number of consecutive zero crossings | 1000                              |
